# Supplementary material
Source: Royal Society of Chemistry journal article supplement (doi:10.1039/d6fo01305h)
Supplement: d6fo01305h1.pdf [file d6fo01305h1.pdf]

1 **Supplementary Data**

2

3

**Table S1.** Microwave digestion program

| Process | Setting temperature<br>(°C) | Temperature rising<br>time (min) | Temperature holding<br>time (min) |
|---------|-----------------------------|----------------------------------|-----------------------------------|
| 1       | 120                         | 6                                | 1                                 |
| 2       | 150                         | 3                                | 5                                 |
| 3       | 180                         | 5                                | 10                                |

4

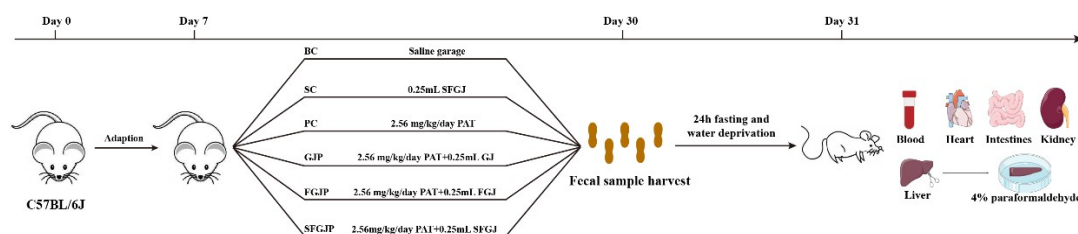

5

6

**Figure S1.** *In vivo* experimental abstract

7

8

**Table S2.** Orthogonal experimental result

| Sample         | A Inoculum<br>size (%) | B Selenium<br>addition time (h) | C Culture<br>time (h) | D      | Y <sub>1</sub> | Y <sub>2</sub> | Y <sub>3</sub> |
|----------------|------------------------|---------------------------------|-----------------------|--------|----------------|----------------|----------------|
| 1              | 1                      | 1                               | 1                     | 1      | 14.26          | 14.38          | 14.51          |
| 2              | 1                      | 2                               | 2                     | 2      | 12.91          | 12.58          | 12.88          |
| 3              | 1                      | 3                               | 3                     | 3      | 10.68          | 10.36          | 10.75          |
| 4              | 2                      | 1                               | 2                     | 3      | 15.84          | 16.10          | 16.10          |
| 5              | 2                      | 2                               | 3                     | 1      | 14.70          | 14.54          | 14.42          |
| 6              | 2                      | 3                               | 1                     | 2      | 13.31          | 13.23          | 13.69          |
| 7              | 3                      | 1                               | 3                     | 2      | 19.54          | 20.07          | 20.08          |
| 8              | 3                      | 2                               | 1                     | 3      | 18.31          | 18.97          | 18.15          |
| 9              | 3                      | 3                               | 2                     | 1      | 16.35          | 16.41          | 17.49          |
| K <sub>1</sub> | 113.30                 | 150.88                          | 138.80                | 137.06 |                |                |                |
| K <sub>2</sub> | 131.93                 | 137.47                          | 136.65                | 135.29 |                |                |                |
| K <sub>3</sub> | 165.37                 | 122.26                          | 135.15                | 135.26 |                |                |                |

9

**Table S3.** Analysis of variance of orthogonal test results

| Items | Sum of squared<br>deviations | Freedom | Mean square | F value | P value | Significance |
|-------|------------------------------|---------|-------------|---------|---------|--------------|
|-------|------------------------------|---------|-------------|---------|---------|--------------|

|                        |        |    |        |             |        |    |
|------------------------|--------|----|--------|-------------|--------|----|
| Inoculum size          | 154.68 | 2  | 77.34  | 675.46<br>3 | P<0.01 | ** |
| Selenium addition time | 45.542 | 2  | 22.771 | 198.87<br>4 | P<0.01 | ** |
| Culture time           | 0.748  | 2  | 0.374  | 3.266       | P>0.05 |    |
| Error                  | 2.29   | 20 | 0.114  |             |        |    |
| Summary                | 203.26 | 26 |        |             |        |    |

10

11

12

13
